# Supplementary material
Source: MDPI journal article supplement (https://www.mdpi.com/2073-4395/11/3/579)
Supplement: s1 [file s1]

Archive with 2 entries (2 files):
- TableS1.xlsx
- SupplementaryFigs_V4.pdf
