# Supplementary material
Source: MDPI journal article supplement (https://www.mdpi.com/2073-4395/11/3/579)
Supplement: s1 [file s1 › SupplementaryFigs_V4.pdf]

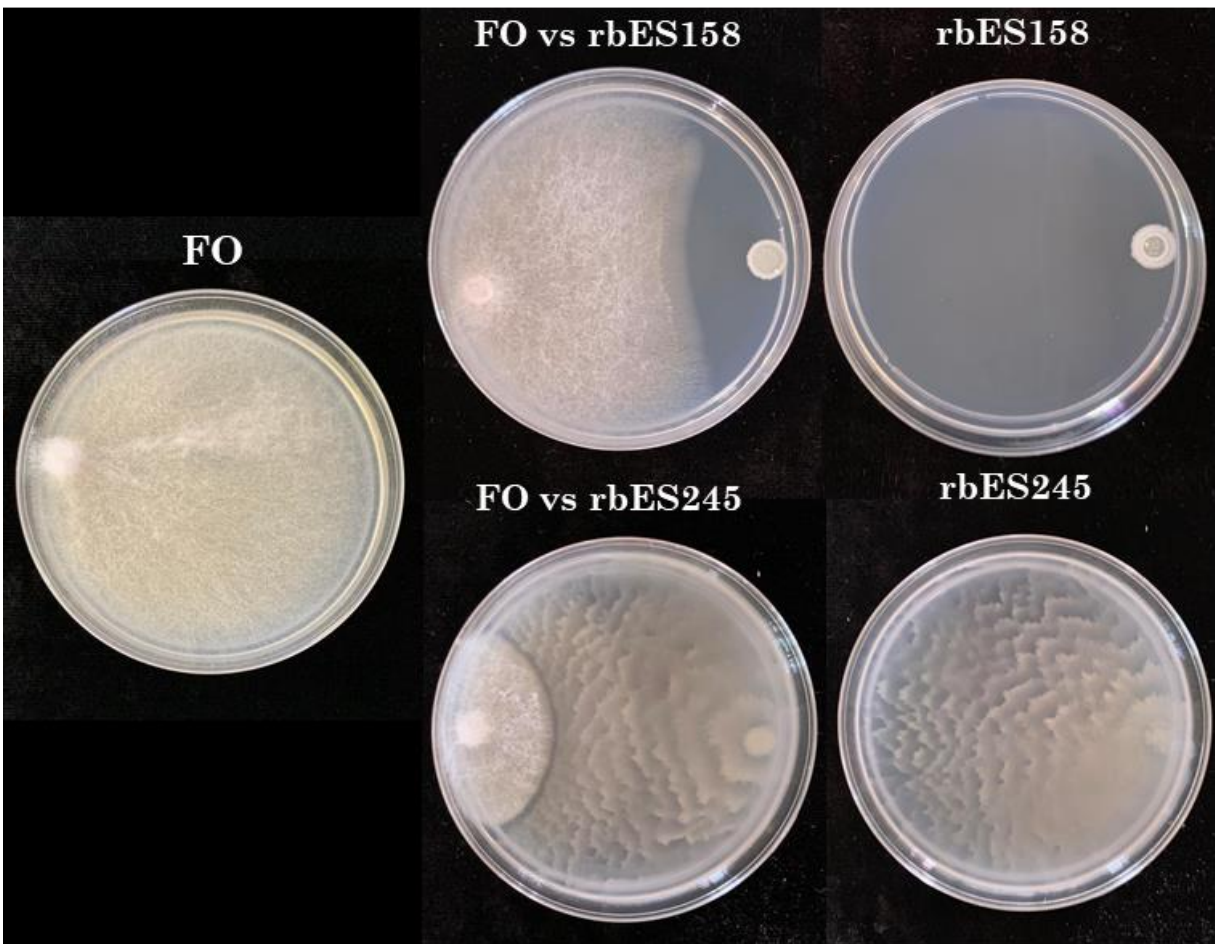

**Figure S1. *Fusarium oxysporum* (FO) inhibition by static (rbES158) and motile (rbES245) Isolates.** Left plate shows the growth of *F. oxysporum* alone, right plates show the growth of bacterial isolates alone, middle plates show fungal growth inhibition in the presence of bacterial isolates.

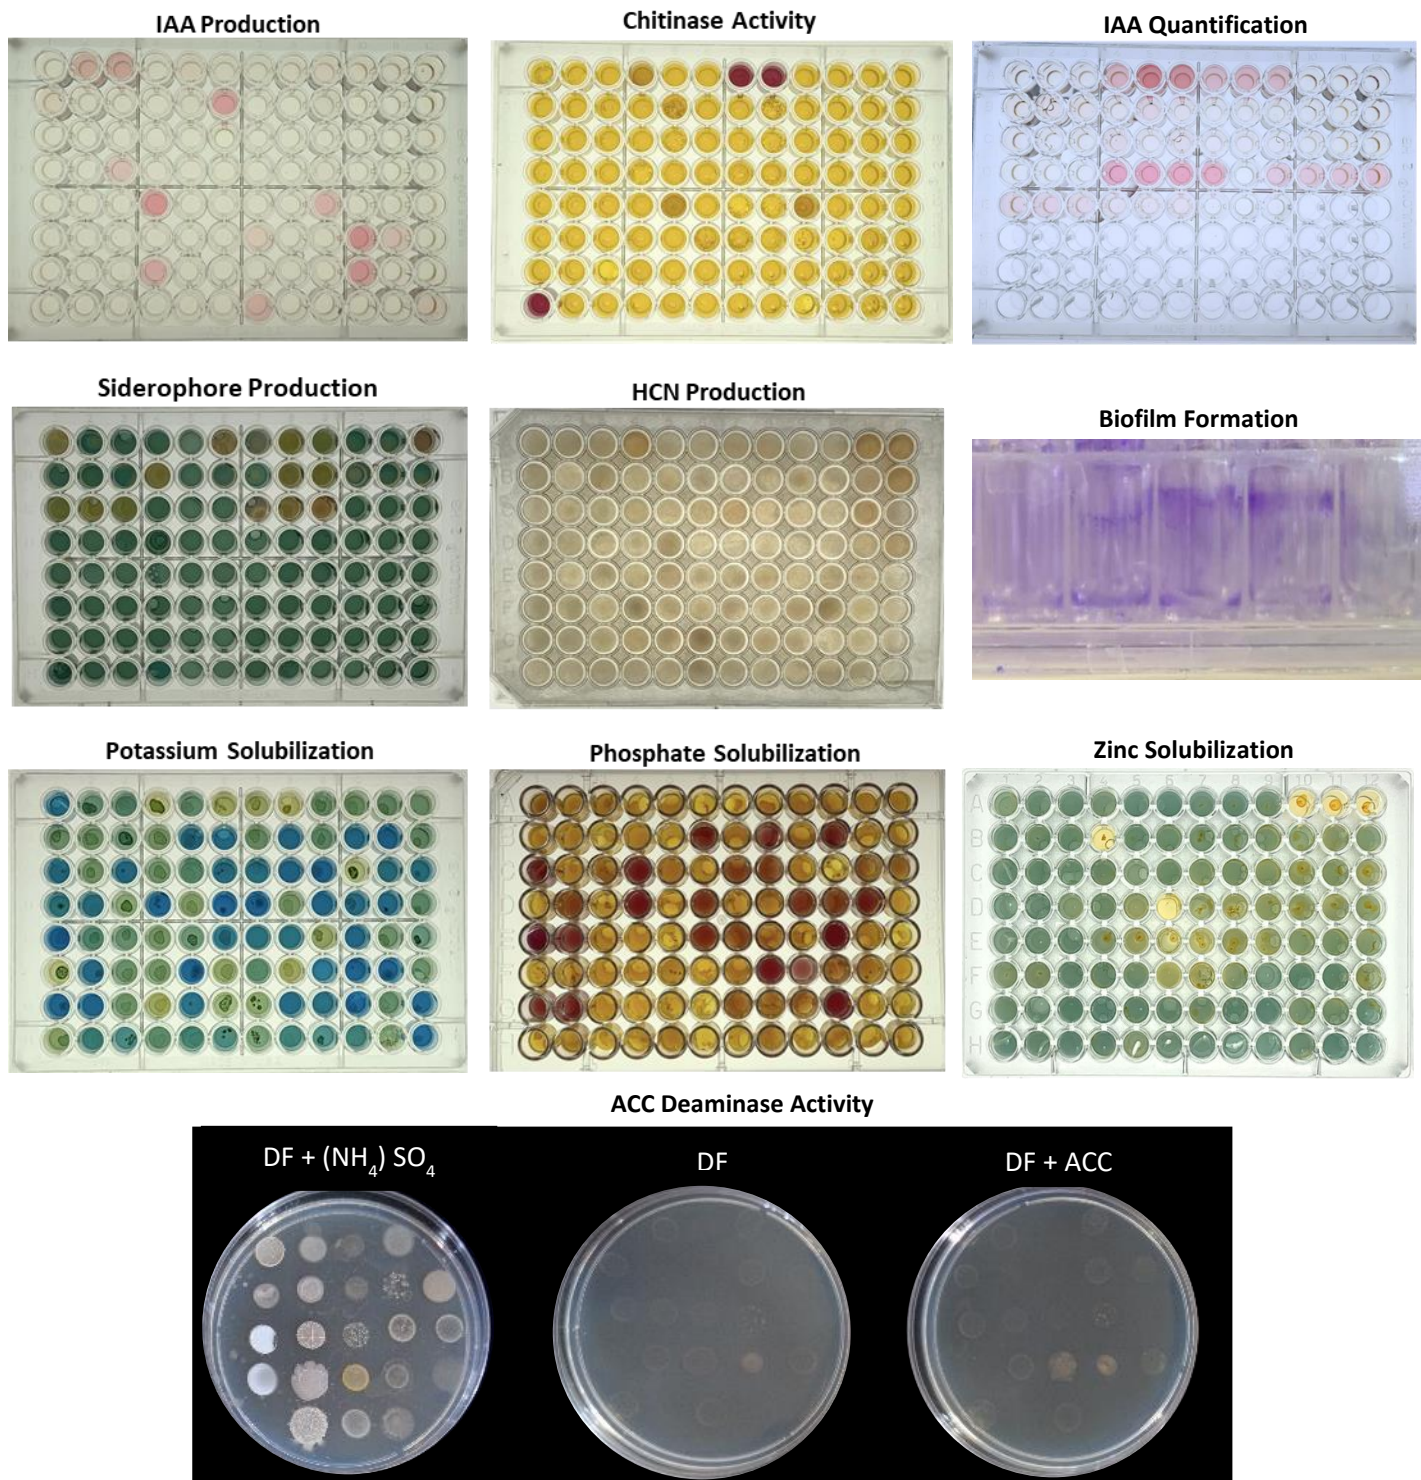

**Figure S2. Microplate assays for the determination of plant growth promotion-associated traits**

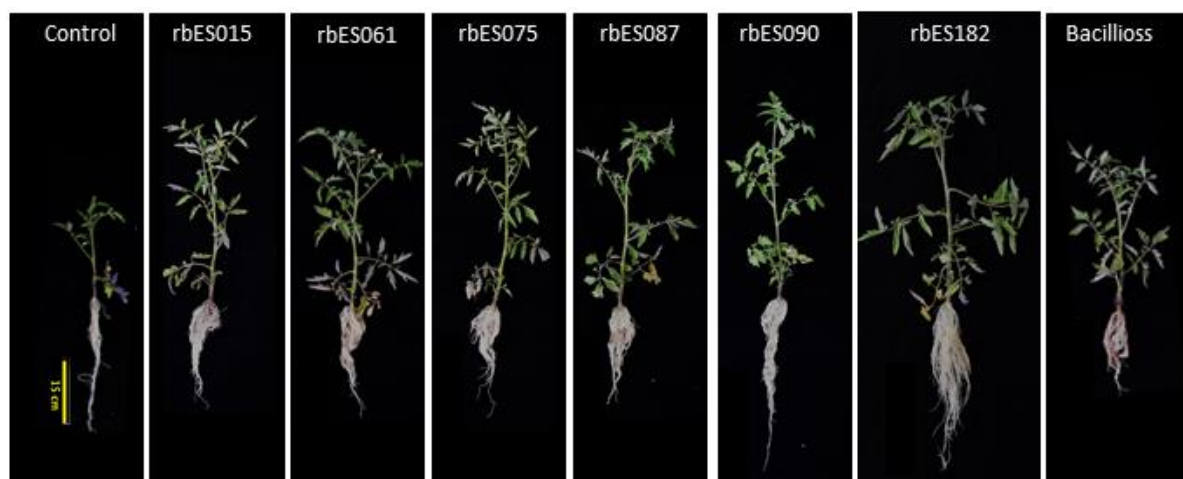

**Figure S3. Effect of the inoculation of different bacterial isolates on the growth of *S. lycopersicum*.** Images were adjusted to scale using a reference ruler (depicted now only in control)

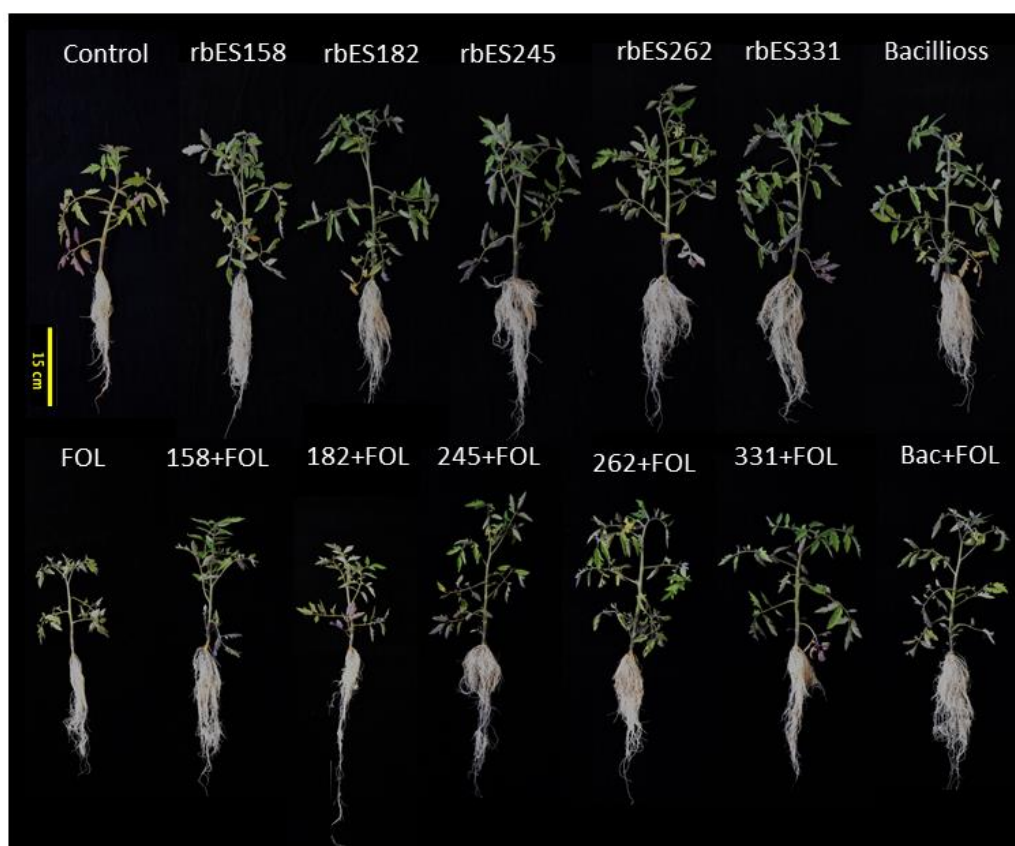

**Figure S4. Effect of *Fusarium oxysporum* on the growth of *S. lycopersicum* inoculated with different bacterial isolates.** Images were adjusted to scale using a reference ruler (depicted now only in control)
