# Supplementary material
Source: MDPI journal article supplement (https://www.mdpi.com/2073-4395/11/3/579)
Supplement: s1 [file s1 › TableS1.xlsx]

## Sheet: Hoja1
Sample	Isolate	HNC	P Sol.	K Sol.	Siderophores	Chitinase	IAA	Inhibition	Inhibition %
M1	rbES001	-	+	+	+	-	+	-	-
M1	rbES002	-	+	-	-	-	+	-	-
M3	rbES003	-	-	-	-	-	-	-	-
M4	rbES004	-	+	-	-	-	-	-	-
M4	rbES005	-	+	+	-	-	+	-	-
M7	rbES006	-	+	-	-	+	+	-	-
M7	rbES007	-	+	+	-	+	-	-	-
M9	rbES008	-	+	+	-	+	+	-	-
M1	rbES009	-	+	-	-	-	-	-	-
M1	rbES010	-	+	-	-	+	+	-	-
M1	rbES011	-	+	-	-	-	-	-	-
M1	rbES012	-	+	-	-	-	-	-	-
M1	rbES013	-	-	-	-	-	+	-	-
M1	rbES014	-	+	+	-	-	+	-	-
M1	rbES015	-	+	+	+	-	+	-	-
M1	rbES016	-	-	-	-	-	+	-	-
M1	rbES017	-	-	-	+	-	+	-	-
M1	rbES018	-	+	+	+	-	+	-	-
M2	rbES019	-	+	-	+	-	+	-	-
M2	rbES020	-	+	+	+	-	+	-	-
M3	rbES021	-	+	-	-	-	+	-	-
M3	rbES022	-	+	-	-	-	-	-	-
M3	rbES023	-	+	-	-	-	+	-	-
M3	rbES024	-	+	-	-	-	+	-	-
M3	rbES025	-	+	-	-	-	-	-	-
M4	rbES026	-	-	+	-	-	+	-	-
M4	rbES027	-	+	-	-	-	-	-	-
M4	rbES028	-	+	-	-	-	+	-	-
M4	rbES029	-	-	+	+	-	+	-	-
M4	rbES030	-	+	+	-	-	+	-	-
M4	rbES031	-	+	+	+	-	+	-	-
M5	rbES032	-	+	+	+	-	+	-	-
M6	rbES033	-	-	-	-	+	-	-	-
M6	rbES034	-	+	+	-	-	-	-	-
M4	rbES035	-	+	-	-	-	+	-	-
M4	rbES036	-	+	-	-	+	+	-	-
M6	rbES037	-	+	-	-	-	+	-	-
M6	rbES038	-	-	+	-	-	+	-	-
M6	rbES039	-	+	+	-	-	+	-	-
M6	rbES040	-	+	-	-	+	+	-	-
M6	rbES041	-	-	+	+	-	+	-	-
M6	rbES042	-	-	-	+	-	+	-	-
M7	rbES043	-	+	+	-	-	+	-	-
M7	rbES044	-	-	+	+	-	+	-	-
M7	rbES045	-	+	-	-	-	-	-	-
M7	rbES046	-	+	+	-	-	-	-	-
M7	rbES047	-	+	-	-	-	+	-	-
M7	rbES048	-	+	-	-	+	-	-	-
M7	rbES049	-	+	+	+	-	+	-	-
M7	rbES050	-	+	+	+	+	+	-	-
M7	rbES051	-	-	-	-	-	+	-	-
M7	rbES052	-	-	+	-	-	+	-	-
M7	rbES053	-	+	+	+	+	+	-	-
M8	rbES054	+	+	-	-	+	-	-	-
M8	rbES055	-	+	+	-	-	-	-	-
M8	rbES056	-	-	+	-	-	+	-	-
M7	rbES057	-	+	+	+	-	+	-	-
M1	rbES058	-	-	-	-	-	-	-	-
M1	rbES059	-	-	-	-	-	+	-	-
M1	rbES060	-	+	-	-	-	-	-	-
M2	rbES061	-	+	+	+	-	+	-	-
M2	rbES062	-	+	+	+	-	+	-	-
M2	rbES063	-	-	-	-	-	+	-	-
M2	rbES064	-	-	-	-	-	-	-	-
M2	rbES065	-	+	+	-	-	+	-	-
M2	rbES066	-	+	+	-	-	+	-	-
M2	rbES067	-	-	-	-	-	-	-	-
M2	rbES068	-	-	-	-	-	-	-	-
M2	rbES069	-	-	-	-	-	-	-	-
M3	rbES070	-	-	-	-	-	-	-	-
M3	rbES071	-	-	-	-	-	+	-	-
M3	rbES072	-	+	-	-	-	-	-	-
M4	rbES073	-	+	-	-	-	+	-	-
M4	rbES074	-	+	-	-	-	+	-	-
M4	rbES075	-	+	+	+	-	+	-	-
M4	rbES076	-	-	+	-	-	+	-	-
M4	rbES077	-	+	-	-	-	-	-	-
M4	rbES078	+	+	-	-	+	-	-	-
M4	rbES079	+	+	+	-	-	-	-	-
M4	rbES080	+	-	+	-	+	-	-	-
M4	rbES081	+	+	-	-	-	-	-	-
M4	rbES082	-	+	-	-	-	-	-	-
M5	rbES083	-	-	-	-	-	+	-	-
M5	rbES084	+	+	-	-	-	-	-	-
M5	rbES085	-	+	+	+	-	+	-	-
M5	rbES086	-	+	+	+	-	+	-	-
M5	rbES087	-	+	+	+	-	+	-	-
M5	rbES088	-	-	-	-	-	-	-	-
M5	rbES089	-	+	-	-	+	+	-	-
M5	rbES090	+	+	+	+	+	+	-	-
M5	rbES091	+	+	+	-	+	-	-	-
M5	rbES092	+	+	+	-	-	-	-	-
M5	rbES093	+	+	-	-	-	+	-	-
M5	rbES094	+	+	+	-	-	+	-	-
M5	rbES095	-	-	+	-	-	-	-	-
M5	rbES096	-	+	-	+	-	-	-	-
M6	rbES097	-	+	+	-	-	-	-	-
M6	rbES098	-	+	+	-	+	+	-	-
M6	rbES099	-	+	-	-	-	+	-	-
M7	rbES100	+	+	+	-	+	+	-	-
M7	rbES101	-	+	-	-	+	+	-	-
M7	rbES102	-	+	-	-	-	+	-	-
M7	rbES103	+	+	-	-	-	+	-	-
M7	rbES104	+	+	-	-	-	-	-	-
M8	rbES105	+	-	-	-	-	-	-	-
M8	rbES106	-	-	-	-	-	-	-	-
M8	rbES107	-	-	-	-	-	+	-	-
M8	rbES108	-	+	-	-	+	+	-	-
M8	rbES109	-	+	-	-	-	+	-	-
M8	rbES110	+	+	-	-	-	+	-	-
M8	rbES111	+	+	-	-	-	-	-	-
M8	rbES112	-	+	-	-	-	-	-	-
M8	rbES113	+	+	-	-	-	-	-	-
M8	rbES114	-	-	-	-	-	-	-	-
M8	rbES115	-	+	-	-	-	-	-	-
M8	rbES116	-	-	-	-	-	-	-	-
M8	rbES117	-	+	-	-	-	-	-	-
M8	rbES118	-	-	-	-	-	+	-	-
M8	rbES119	-	+	+	-	-	+	-	-
M8	rbES120	-	+	+	-	-	+	-	-
M8	rbES121	-	+	-	-	-	-	-	-
M8	rbES122	-	+	-	-	-	-	-	-
M8	rbES123	-	+	-	-	-	-	-	-
M9	rbES124	-	+	-	-	-	+	-	-
M5	rbES125	-	+	-	-	-	-	-	-
M9	rbES126	-	+	-	-	-	+	-	-
M9	rbES127	-	+	-	-	+	+	-	-
M9	rbES128	-	+	-	-	+	+	-	-
M9	rbES129	-	+	-	-	-	+	-	-
M9	rbES130	-	+	-	-	-	+	-	-
M9	rbES131	-	+	-	-	-	+	-	-
M10	rbES132	-	+	-	-	-	+	-	-
M10	rbES133	-	+	-	-	+	+	-	-
M10	rbES134	-	-	-	-	-	+	-	-
M10	rbES135	-	+	-	-	-	+	-	-
M10	rbES136	-	+	-	-	-	+	-	-
M10	rbES137	-	+	-	-	-	+	-	-
M10	rbES138	-	+	-	-	-	+	-	-
M10	rbES139	-	+	-	-	-	+	-	-
M10	rbES140	-	+	-	-	-	+	-	-
M9	rbES141	-	+	-	-	-	+	-	-
M9	rbES142	-	+	-	-	-	+	-	-
M9	rbES143	-	-	-	-	-	+	-	-
M10	rbES144	-	+	-	-	+	-	-	-
M10	rbES145	-	+	+	-	+	+	-	-
M10	rbES146	-	+	+	-	-	+	-	-
M10	rbES147	-	+	-	-	-	-	-	-
M10	rbES148	-	+	-	-	-	+	-	-
M10	rbES149	-	+	-	+	-	+	-	-
M10	rbES150	-	+	-	-	-	+	-	-
M10	rbES151	-	+	-	+	-	-	-	-
M10	rbES152	-	+	-	-	-	+	-	-
M9	rbES153	-	+	-	-	-	+	-	-
M7	rbES154	+	+	-	-	-	-	-	-
M8	rbES155	-	+	-	-	-	+	-	-
M7	rbES156	-	+	-	-	+	+	-	-
M1	rbES157	-	+	-	+	-	+	-	-
M4	rbES158	-	+	+	+	-	-	+	24,04
M6	rbES159	-	+	-	-	-	+	-	-
M3	rbES160	-	+	-	-	-	-	-	-
M3	rbES161	-	+	+	-	+	+	-	-
M3	rbES162	-	+	-	-	-	+	-	-
M5	rbES163	-	+	-	-	-	+	-	-
M3	rbES164	-	-	-	-	-	-	+	24,04
M1	rbES165	-	+	-	-	-	+	-	-
M3	rbES166	-	-	-	-	+	+	-	-
M5	rbES167	-	+	-	-	-	-	-	-
M1	rbES168	-	+	-	-	-	-	-	-
M1	rbES169	-	+	+	+	-	+	-	-
M2	rbES170	-	+	+	-	+	-	-	-
M2	rbES171	-	+	+	-	-	+	-	-
M3	rbES172	-	+	-	-	-	-	-	-
M4	rbES173	-	+	-	-	+	+	-	-
M5	rbES174	-	+	+	-	+	+	-	-
M8	rbES175	-	-	-	-	+	+	-	-
M4	rbES176	-	+	-	-	-	-	-	-
M9	rbES177	-	+	-	-	-	-	-	-
M9	rbES178	-	+	-	-	-	-	+	34,23
M9	rbES179	-	-	-	-	-	-	-	-
M9	rbES180	-	+	-	-	-	-	-	-
M9	rbES181	-	+	+	-	-	-	-	-
M9	rbES182	-	+	+	-	-	+	+	58,15
M9	rbES183	-	+	-	-	-	-	-	-
M9	rbES184	-	+	-	-	+	-	-	-
M9	rbES185	-	+	-	-	+	-	-	-
M9	rbES186	-	+	-	-	+	-	-	-
M9	rbES187	-	+	-	-	-	-	+	23,5
M9	rbES188	-	+	-	-	-	-	-	-
M9	rbES189	-	+	-	-	-	-	-	-
M9	rbES190	-	-	-	-	-	-	-	-
M9	rbES191	-	-	-	-	-	-	-	-
M9	rbES192	-	+	-	-	-	-	+	40,48
M9	rbES193	-	-	-	-	-	-	+	27,3
M9	rbES194	-	-	-	-	-	-	-	-
M9	rbES195	-	+	-	-	-	-	-	-
M9	rbES196	-	+	-	-	-	-	-	-
M9	rbES197	-	+	-	-	-	-	-	-
M9	rbES198	-	+	-	-	-	-	-	-
M9	rbES199	-	+	+	-	-	-	+	20,92
M9	rbES200	-	+	-	-	-	-	+	40,89
M9	rbES201	-	+	+	-	-	-	+	61,95
M9	rbES202	+	+	-	-	-	-	-	-
M9	rbES203	-	+	-	-	-	-	-	-
M9	rbES204	-	+	-	-	-	-	-	-
M10	rbES205	-	+	-	-	-	-	-	-
M10	rbES206	-	-	-	-	-	-	-	-
M10	rbES207	-	+	-	-	-	-	-	-
M10	rbES208	+	+	-	-	-	-	-	-
M10	rbES209	-	+	+	-	-	-	-	-
M10	rbES210	+	+	-	+	-	-	-	-
M10	rbES211	-	+	+	-	-	-	+	11,27
M10	rbES212	-	+	+	+	-	-	-	-
M10	rbES213	-	+	-	-	-	-	+	33,28
M10	rbES214	-	+	-	-	-	-	-	-
M10	rbES215	-	+	+	-	-	-	-	-
M10	rbES216	-	+	-	-	-	-	-	-
M10	rbES217	-	+	+	-	-	-	-	-
M10	rbES218	-	-	-	-	-	-	-	-
M10	rbES219	-	+	-	-	-	-	+	16,16
M10	rbES220	-	-	+	-	-	-	-	-
M10	rbES221	-	-	-	-	-	-	-	-
M10	rbES222	+	+	+	-	-	-	+	25,27
M10	rbES223	+	+	+	-	-	-	-	-
M10	rbES224	+	+	-	-	-	-	-	-
M10	rbES225	-	+	-	-	-	-	-	-
M10	rbES226	-	+	-	-	-	-	-	-
M10	rbES227	-	-	-	-	-	-	+	27,85
M10	rbES228	-	-	-	-	-	-	-	-
M10	rbES229	-	+	+	-	-	-	-	-
M10	rbES230	-	+	+	-	-	-	-	-
M11	rbES231	-	-	-	-	-	-	-	-
M11	rbES232	-	-	+	-	-	-	+	66,84
M11	rbES233	-	+	+	-	-	-	+	52,07
M11	rbES234	-	+	-	-	-	-	-	-
M11	rbES235	-	+	+	-	-	-	+	58,15
M11	rbES236	-	-	-	-	-	-	-	-
M11	rbES237	-	+	-	-	-	-	-	-
M11	rbES238	-	-	-	-	-	-	-	-
M11	rbES239	-	-	-	-	-	+	-	-
M11	rbES240	-	-	-	-	-	-	-	-
M11	rbES241	-	-	-	-	-	-	-	-
M11	rbES242	-	+	-	-	-	-	-	-
M11	rbES243	-	+	-	-	-	-	+	37,22
M11	rbES244	-	+	-	-	-	+	-	-
M11	rbES245	-	+	-	-	-	-	+	69,83
M11	rbES246	+	-	-	-	-	-	-	-
M11	rbES247	-	+	-	-	-	-	-	-
M11	rbES248	-	+	-	-	-	-	+	9,64
M11	rbES249	-	+	-	-	-	-	-	-
M11	rbES250	-	-	-	-	-	-	-	-
M11	rbES251	-	-	-	-	-	-	-	-
M11	rbES252	-	+	-	-	-	-	+	49,04
M11	rbES253	-	+	-	-	-	-	+	69,15
M11	rbES254	-	+	-	-	-	-	+	57,47
M11	rbES255	-	-	+	-	-	-	-	-
M11	rbES256	-	+	+	-	-	-	+	55,16
M11	rbES257	-	+	+	-	-	-	-	-
M11	rbES258	+	-	-	-	-	-	-	-
M11	rbES259	-	+	-	-	-	-	-	-
M11	rbES260	+	-	-	-	-	-	-	-
M12	rbES261	-	+	-	-	-	-	+	26,9
M12	rbES262	-	-	-	-	-	-	+	68,61
M12	rbES263	-	+	-	-	-	-	-	-
M12	rbES264	-	+	-	-	-	-	-	-
M12	rbES265	-	-	-	-	-	-	-	-
M12	rbES266	-	+	+	-	-	-	+	47,69
M12	rbES267	-	+	+	-	-	-	+	19,15
M12	rbES268	-	+	+	-	-	-	+	37,77
M12	rbES269	-	-	+	-	-	-	+	54,34
M12	rbES270	-	+	-	-	-	-	-	-
M12	rbES271	-	+	-	-	-	-	-	-
M12	rbES272	-	+	-	-	-	-	+	23,91
M12	rbES273	-	+	-	-	-	-	+	35,32
M12	rbES274	-	+	-	-	-	-	-	-
M12	rbES275	-	-	-	-	-	-	+	29,09
M12	rbES276	-	+	-	-	-	-	-	-
M12	rbES277	-	-	-	-	-	-	+	22,26
M12	rbES278	-	+	+	-	-	-	-	-
M12	rbES279	-	-	-	-	-	-	-	-
M12	rbES280	-	-	+	-	-	-	+	51,9
M12	rbES281	-	+	+	-	-	+	-	-
M12	rbES282	-	-	-	-	-	-	-	-
M12	rbES283	-	+	-	-	-	-	-	-
M9	rbES284	-	-	-	-	-	-	-	-
M9	rbES285	-	+	-	-	-	-	+	63,99
M9	rbES286	+	+	-	-	-	-	-	-
M9	rbES287	-	+	-	-	-	-	-	-
M9	rbES288	-	+	-	-	-	-	-	-
M9	rbES289	-	+	-	-	-	-	-	-
M9	rbES290	-	-	+	-	-	-	+	9,64
M9	rbES291	-	-	-	-	-	-	-	-
M9	rbES292	-	-	-	-	-	-	-	-
M9	rbES293	-	-	-	-	-	-	-	-
M9	rbES294	-	-	-	-	-	-	-	-
M9	rbES295	-	-	-	-	-	+	-	-
M9	rbES296	-	-	-	-	-	-	-	-
M9	rbES297	-	+	-	-	-	-	-	-
M9	rbES298	-	-	-	-	-	-	-	-
M9	rbES299	-	-	-	-	-	+	-	-
M9	rbES300	-	+	-	-	-	+	-	-
M9	rbES301	-	-	-	-	-	+	-	-
M10	rbES302	-	-	+	-	-	-	-	-
M10	rbES303	-	-	-	-	-	-	-	-
M10	rbES304	-	+	-	-	-	-	-	-
M10	rbES305	-	-	-	-	-	-	-	-
M10	rbES306	-	-	-	-	-	-	-	-
M10	rbES307	+	-	-	-	-	-	+	9,91
M10	rbES308	-	+	-	-	-	+	-	-
M10	rbES309	-	+	-	-	-	-	-	-
M10	rbES310	-	-	-	-	-	-	-	-
M10	rbES311	-	+	-	-	-	-	-	-
M10	rbES312	-	+	-	-	+	-	-	-
M10	rbES313	-	-	+	-	-	-	-	-
M10	rbES314	-	+	-	-	-	+	-	-
M10	rbES315	-	-	-	-	-	+	-	-
M10	rbES316	-	-	-	-	-	-	-	-
M10	rbES317	-	-	-	-	-	+	-	-
M10	rbES318	-	-	-	-	-	-	-	-
M10	rbES319	-	-	-	-	-	-	-	-
M10	rbES320	-	-	-	-	-	+	+	5,02
M10	rbES321	-	-	-	-	-	-	-	-
M10	rbES322	-	+	-	-	-	-	-	-
M10	rbES323	-	-	-	-	-	-	-	-
M10	rbES324	-	-	-	-	-	-	-	-
M10	rbES325	-	+	-	-	-	-	-	-
M10	rbES326	-	-	-	-	-	-	-	-
M10	rbES327	-	-	-	-	-	-	-	-
M11	rbES328	-	-	-	-	-	-	+	10,46
M11	rbES329	-	-	-	-	-	+	+	7,2
M11	rbES330	-	-	-	-	-	+	-	-
M11	rbES331	-	-	-	-	-	+	+	23,09
M11	rbES332	-	-	-	-	-	+	-	-
M11	rbES333	-	-	-	-	-	+	-	-
M11	rbES334	-	-	-	-	-	-	-	-
M11	rbES335	-	-	-	-	-	-	-	-
M11	rbES336	-	-	-	-	-	+	-	-
M11	rbES337	-	-	-	-	-	-	-	-
M12	rbES338	-	-	-	-	-	+	-	-
M12	rbES339	-	-	-	-	-	+	-	-
M12	rbES340	-	-	-	-	-	-	-	-
M12	rbES341	-	+	-	-	-	-	-	-
M12	rbES342	-	-	-	-	-	-	-	-
M12	rbES343	-	-	-	-	-	-	-	-
Total		30	228	85	31	36	134	43
